# Supplementary material for: Gas phase reactions of iodide and bromide anions with ozone: evidence for stepwise and reversible reactions
Source: Royal Society of Chemistry journal article supplement (doi:10.1039/d0cp01498b), 2020-01-01
Supplement: d0cp01498b1.pdf [file d0cp01498b1.pdf]

## SUPPORTING INFORMATION

### Gas phase reactions of iodide and bromide anions with ozone: evidence for stepwise and reversible reactions

Mahendra Bhujel,<sup>a</sup> David L. Marshall,<sup>a</sup> Alan T. Maccarone,<sup>b</sup> Benjamin I. McKinnon,<sup>b</sup> Adam J. Trevitt,<sup>b</sup> Gabriel R. Da Silva,<sup>c</sup> Stephen J. Blanksby\*<sup>a</sup> and Berwyck L. J. Poad\*<sup>a</sup>

<sup>a</sup>Central Analytical Research Facility, Institute for Future Environments, Queensland University of Technology, Brisbane QLD 4001, Australia

<sup>b</sup>School of Chemistry and Molecular Bioscience, University of Wollongong, Wollongong NSW 2522, Australia

<sup>c</sup> Department of Chemical Engineering, University of Melbourne, Parkville, VIC 3010, Australia.

#### Table of Contents:

---

|                   |                                                                                                                  |         |
|-------------------|------------------------------------------------------------------------------------------------------------------|---------|
| <b>Figure S1:</b> | Comparison of mass spectrometric synthesis for $\text{IO}_x^-$                                                   | Page S2 |
| <b>Figure S2:</b> | Mass spectrum of the reaction of $\text{IO}_3^-$ with oxygen                                                     | Page S2 |
| <b>Figure S3:</b> | Mass spectra and kinetic traces for the $^{81}\text{Br}^-$ bromide isotope reacting with ozone                   | Page S3 |
| <b>Figure S4:</b> | Photodissociation of $\text{IO}_x^-$ ( $x = 1-3$ ) at 500 and 266 nm                                             | Page S3 |
| <b>Table S1:</b>  | Ozone concentrations within the ion trap determined from reactions of $\text{Ba}^+$ and phenide charge exchange. | Page S4 |
| <b>Figure S5:</b> | Example mass spectrum and kinetic trace for $\text{Ba}^+$ reacting with ozone                                    | Page S4 |
| <b>Figure S6:</b> | Example mass spectrum and kinetic trace for phenide anion reacting with ozone                                    | Page S5 |

---

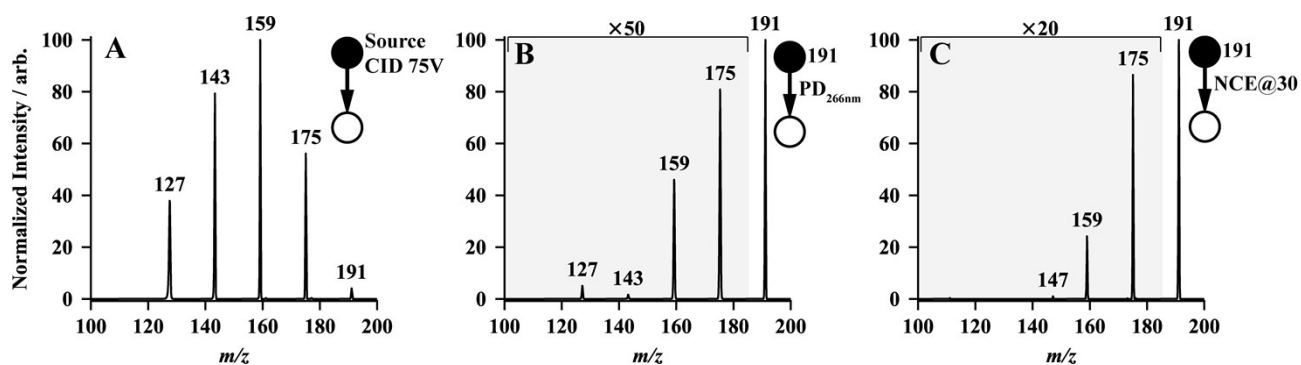

Figure S1: Comparison of three methods for synthesising  $\text{IO}_x^-$  intermediates from a solution of  $\text{NaIO}_4$  in methanol: (A) Source-based collisional activation with 75 eV activation energy; (B) photodissociation of mass selected  $\text{IO}_4^-$  ( $m/z$  191) with a single pulse of 266 nm laser radiation; (C) ion-trap collisional activation of mass selected  $\text{IO}_4^-$  ( $m/z$  191) with a Normalised Collision Energy of 30 (arb. units).

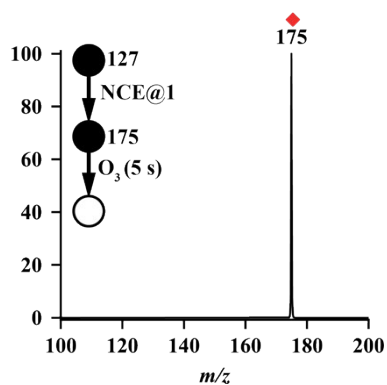

Figure S2: Reaction of  $\text{IO}_3^-$  ( $m/z$  175) with ozone for 5 s. No reaction products are observed that correspond to further oxidation to form  $\text{IO}_4^-$  ( $m/z$  191), nor back reactions to lower oxides.

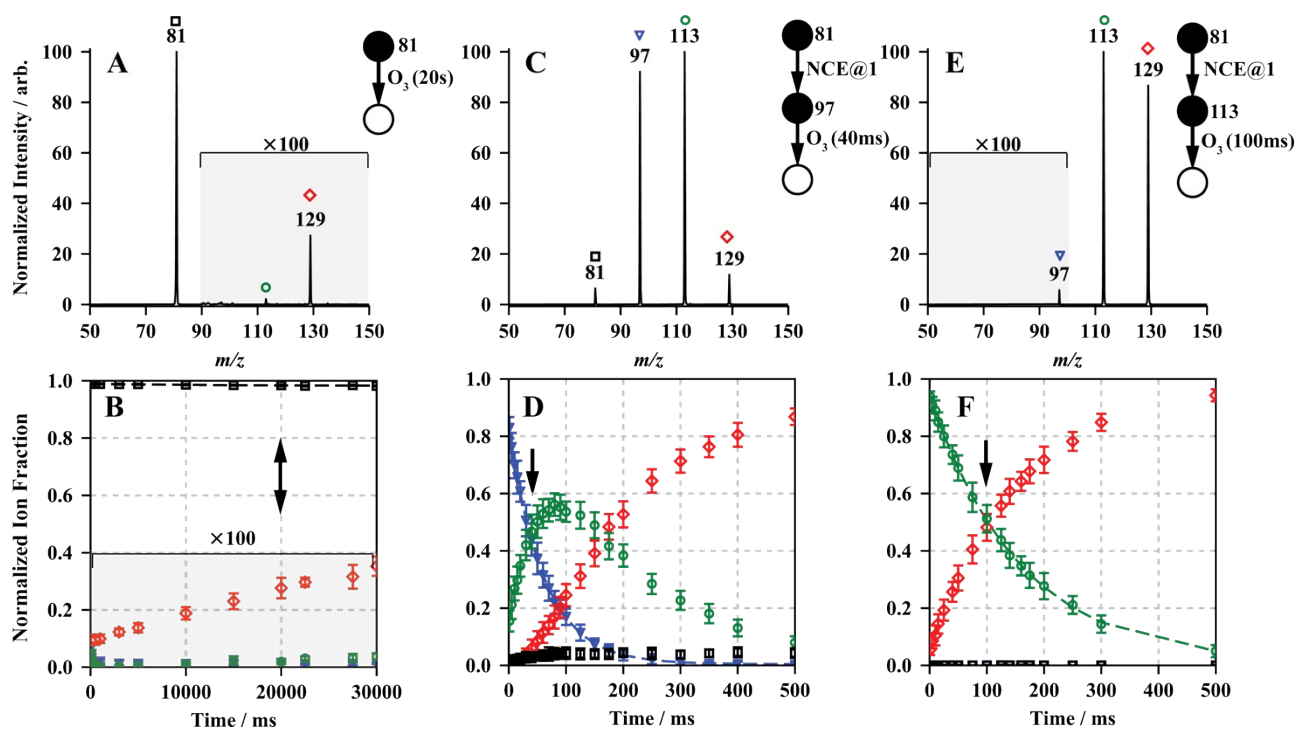

Figure S3: Mass spectra and kinetic traces for the companion bromide isotope  $^{81}\text{Br}^-$  reacting with ozone. (A) Mass spectrum of  $^{81}\text{Br}^-$  ( $m/z$  81) reacting with ozone at 20 s reaction time, (B) kinetic plot showing decay of  $^{81}\text{Br}^-$  and growth of  $\text{BrO}_3^-$  ( $m/z$  129), (C) Mass spectrum of  $^{81}\text{BrO}^-$  ( $m/z$  97) reacting with ozone for 40 ms, (D) associated kinetic plot showing decay of  $m/z$  97, growth and subsequent decay of  $m/z$  113 and ultimate growth of  $m/z$  129, (E) Mass spectrum of  $^{81}\text{BrO}_2^-$  ( $m/z$  113) reacting with ozone for 100 ms, (F) associated kinetic plot showing decay of  $m/z$  113 and growth of  $m/z$  129. Arrows in the lower panels indicate the time points mass spectra are taken from.

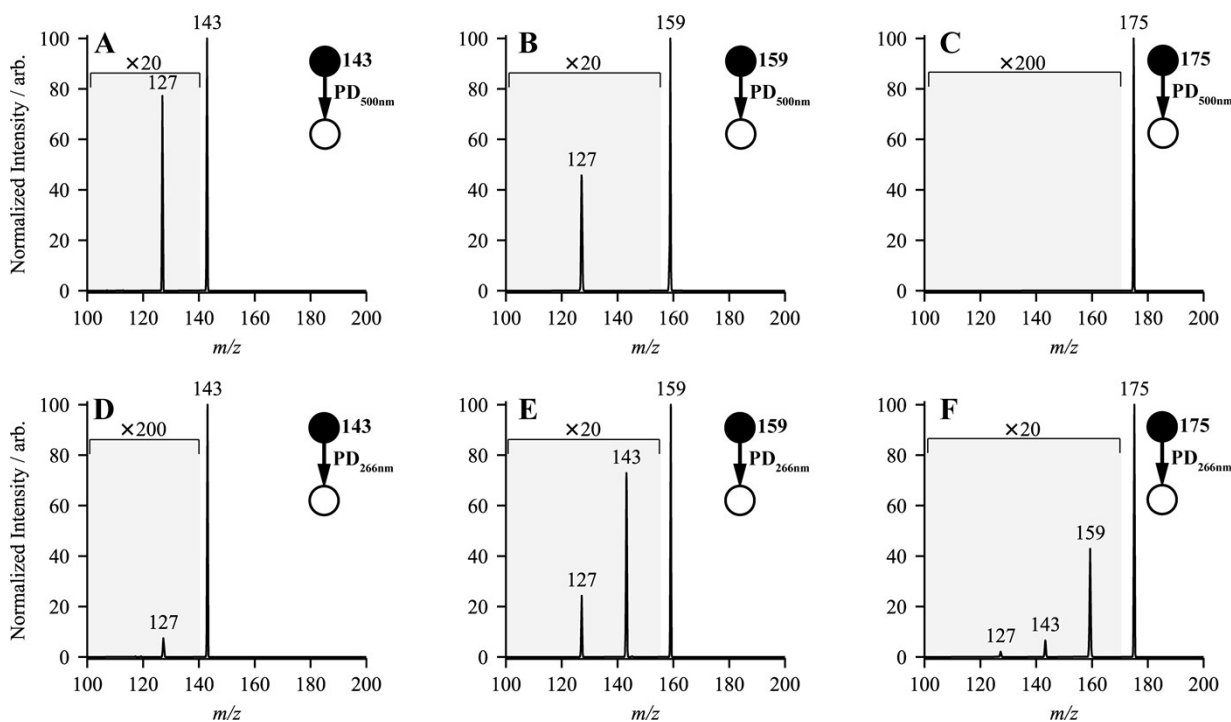

Figure S4: Comparison of the photodissociation products from a single pulse of 500 nm radiation from mass selected (A)  $\text{IO}^-$  (B)  $\text{IO}_2^-$  and (C)  $\text{IO}_3^-$  compared to 266 nm photodissociation from mass selected (D)  $\text{IO}^-$  (E)  $\text{IO}_2^-$  and (F)  $\text{IO}_3^-$ . All precursors were synthesised using Source CID set to 75 eV (see Figure S1A). Note the different magnification factors used in each spectrum.

**Table S1:** Comparison of two independent ion-molecule reactions for the experimental determination of ozone concentration in the ion-trap. Literature value for Ba<sup>+</sup> was taken from Feil et al., J. Phys. Chem. A. **2007**, 111, 13397-13402. The charge exchange reaction between phenide (C<sub>6</sub>H<sub>5</sub><sup>-</sup>) anion and ozone was assumed to be collision limited, and the trajectory collision rate at 320K was used.

|                                                                                       | Ba <sup>+</sup>              | Phenide                 |
|---------------------------------------------------------------------------------------|------------------------------|-------------------------|
| m/z                                                                                   | 138                          | 77                      |
| k' / s <sup>-1</sup>                                                                  | 30.8                         | 38.2                    |
| t <sub>1/2</sub> / ms                                                                 | 20                           | 18                      |
| Literature k <sub>2</sub> /<br>cm <sup>3</sup> molecule <sup>-1</sup> s <sup>-1</sup> | 8.6 × 10 <sup>-10</sup>      | 9.2 × 10 <sup>-10</sup> |
| [O <sub>3</sub> ] / molecules cm <sup>-3</sup>                                        | 3.6(±0.1) × 10 <sup>10</sup> | 4.2 × 10 <sup>10</sup>  |

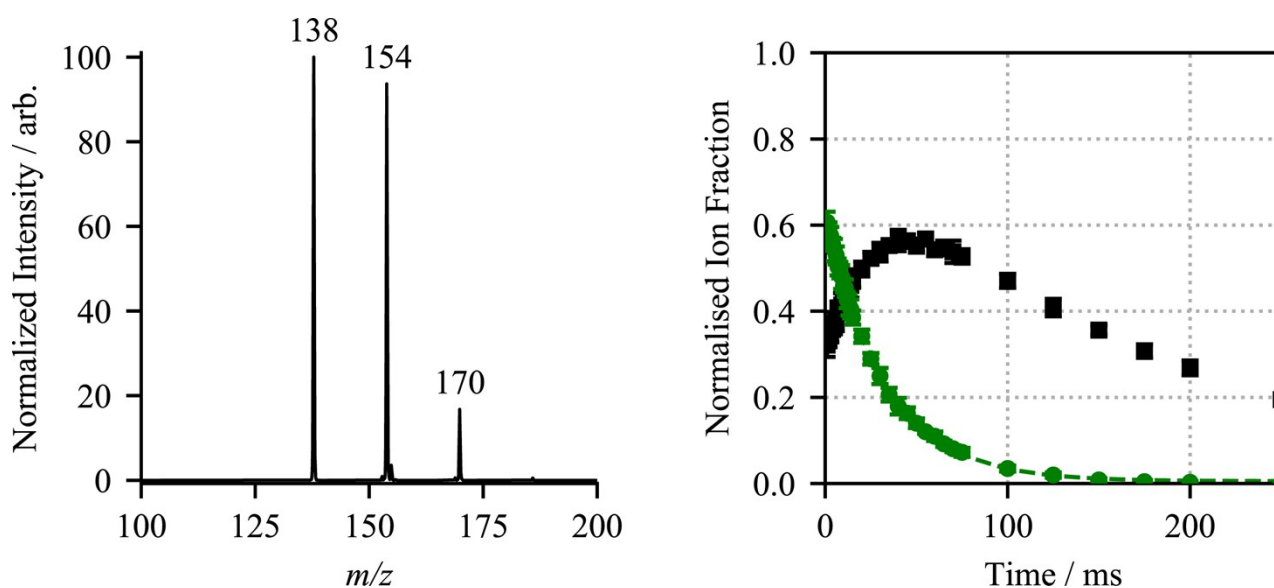

Figure S5: Mass spectrum and kinetic trace for the reaction of barium cation (Ba<sup>+</sup>; m/z 138 green circles in kinetic trace) with ozone, producing charged products BaO<sup>+</sup> (m/z 154; black squares in kinetic trace) and BaO<sub>2</sub><sup>+</sup> (m/z 170)

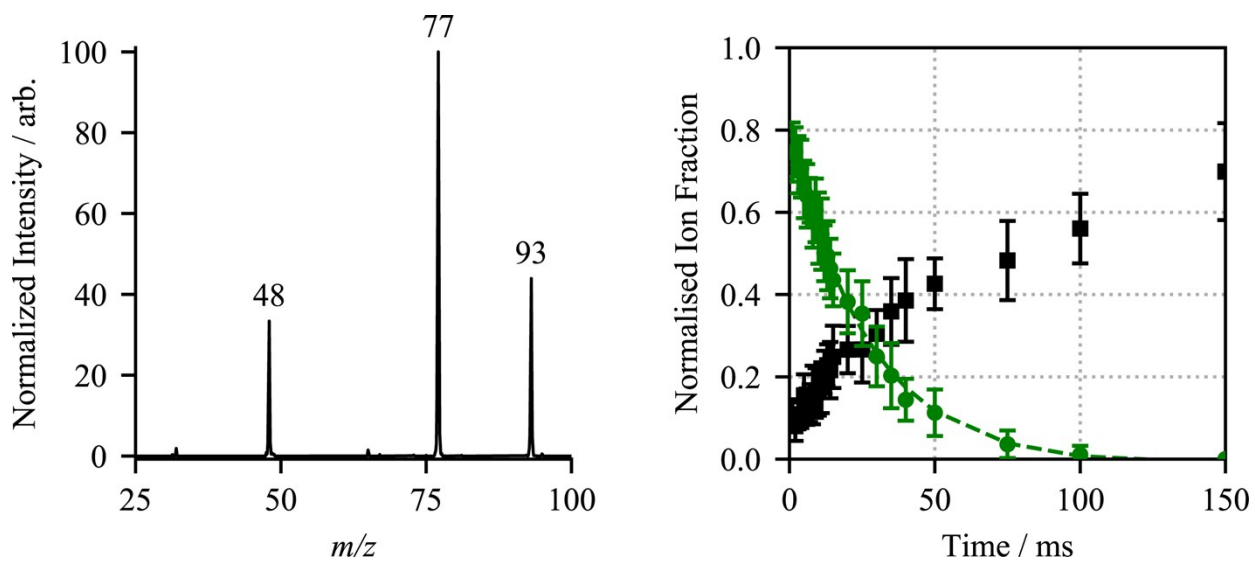

Figure S6: Mass spectrum and kinetic trace for the charge exchange reaction between phenide anion ( $m/z$  77) and ozone producing charged products corresponding to  $\text{O}_3^-$  ( $m/z$  48) and  $\text{C}_6\text{H}_5\text{O}^-$  ( $m/z$  93).
